**S14 Table:** Acceptor and donor candidates for ERR103403 run with yara, species filter and no samflag filter. Sampling sensitivity = 85. No taxon blacklist. No parent blacklist. No species blacklist. (-)0.000\* represents absolute values < 0.0004. The supposed acceptor is marked in bold.

| Type                | Candidate                                               |                    | MicrobeGPS metrics |              |               | DaisyGPS metrics |                |
|---------------------|---------------------------------------------------------|--------------------|--------------------|--------------|---------------|------------------|----------------|
|                     | Name                                                    | Accession.Version  | Number Reads       | Validity     | Heterogeneity | Donor Score      | Acceptor Score |
| <b>Acceptor</b>     | <b>Staphylococcus aureus subsp. aureus HO 5096 0412</b> | <b>NC.017763.1</b> | <b>206493</b>      | <b>0.813</b> | <b>0.063</b>  | <b>0.750</b>     | <b>0.039</b>   |
| Acceptor            | Staphylococcus aureus subsp. aureus                     | NZ_CP007659.1      | 206231             | 0.806        | 0.066         | 0.74             | 0.038          |
| Donor               | Staphylococcus warneri SG1                              | NC.020164.1        | 196                | 0.003        | 0.639         | -0.636           | -0.000*        |
| Donor               | Staphylococcus pseudintermedius HKU10-03                | NC.014925.1        | 705                | 0.001        | 0.582         | -0.581           | -0.000*        |
| Donor               | Staphylococcus epidermidis RP62A                        | NC.002976.3        | 2171               | 0.005        | 0.537         | -0.532           | -0.000*        |
| Donor               | Staphylococcus haemolyticus JCSC1435                    | NC.007168.1        | 1398               | 0.005        | 0.287         | -0.283           | -0.000*        |
| Donor               | Staphylococcus aureus subsp. aureus TW20                | NC.017331.1        | 27837              | 0.096        | 0.364         | -0.268           | -0.002         |
| Acceptor-like Donor | Staphylococcus aureus CA-347                            | NC.021554.1        | 31231              | 0.148        | 0.146         | 0.003            | 0.000*         |
